# Supplementary material for: Effects of Eicosapentaenoic Acid in Glycerol Phosphate Shuttle GPD2 Regulated Inflammatory and Thermogenic Responses
Source: Research Square preprint supplement (doi:10.21203/rs.3.rs-5044316/v1), 2024-12-31
Supplement: Supplementary file 1 [file 848ad2f21e48da2e859d8d06.docx]

**Supplementary Information**

**Supplementary Table S1.** Diet composition

|  | **HF Diet** | | **HF-EPA Diet**  (18g EPA/kg) | | |
| --- | --- | --- | --- | --- | --- |
|  | gram | kcal (%) | | gram | kcal (%) |
| Protein | 24 | 20 | | 24 | 20 |
| Carbohydrate | 41 | 35 | | 41 | 35 |
| Fat | 24 | 45 | | 24 | 45 |
| **Total** |  | **100** | |  | **100** |
| **kcal/gm** | **4.7** |  | | **4.7** |  |
|  |  |  | |  |  |
| Ingredient | gram | kcal (%) | | gram | kcal (%) |
| Casein | 200 | 800 | | 200 | 800 |
| L-Cystine | 3 | 12 | | 3 | 12 |
| Corn Starch | 72.8 | 291 | | 72.8 | 291 |
| Maltodextrin 10 | 100 | 400 | | 100 | 400 |
| Sucrose | 172.8 | 691 | | 172.8 | 691 |
| Cellulose | 50 | 0 | | 50 | 0 |
| Soybean Oil | 25 | 225 | | 25 | 225 |
| Lard | 177.5 | 1598 | | 155.5 | 1400 |
| Alask Omega EE (700 mg/g EPA) | 0 | 0 | | 22 | 198 |
| Mineral Mix S10026 | 10 | 0 | | 10 | 0 |
| DiCalcium Phosphate | 13 | 0 | | 13 | 0 |
| Calcium Carbonate | 5.5 | 0 | | 5.5 | 0 |
| Potassium Citrate, 1 H2O | 16.5 | 0 | | 16.5 | 0 |
| Vitamin Mix V10001 | 10 | 40 | | 10 | 40 |
| Choline Bitartrate | 2 | 0 | | 2 | 0 |
| Vitamin E Acetate, 50% (500 IU/gm) | 0.13 | 0 | | 0.13 | 0 |
| FD&C Yellow Dye #5 | 0.025 | 0 | | 0 | 0 |
| FD&C Red Dye #40 | 0 | 0 | | 0.05 | 0 |
| FD&C Blue Dye #1 | 0.025 | 0 | | 0 | 0 |
| **Total** | **858.28** | **4057** | | **858.28** | **4057** |

**Supplementary Table S2.** Primer sequences

| **Gene** | **Forward (5 ́-3 ́)** | **Reverse (5 ́-3 ́)** |
| --- | --- | --- |
| Acaca | GCAGCAGTTACACCACATACA | CATTACCTCAATCTCAGCATAGCA |
| Fasn | TGTATCCTGCTGTCCAACCT | GGCTTGTCCTGCTCTAACTG |
| Pparα | ATCCACGAAGCCTACCTGAA | AATCGGACCTCTGCCTCTT |
| Cpt2 | CAGCACAGCATCGTACCCA | TCCCAATGCCGTTCTCAAAAT |
| Acat1 | TCACGGCAGAAGCAGGAT | GCACAATCTCAGCACGGAAG |
| Ehhadh | TCATTCCTAGCCGATACTCTTCC | GTTACCAACAACGACTCCAATCT |
| Pex5 | CAGGCAGAGTTGGAGGAGAT | CTTGTCATAGGAAGCGGATGTG |
| Acox1 | CGCCACCTTCAATCCAGAG | TTCTTAACAGCCACCTCGTAAC |
| Tnfα | CGTGGAACTGGCAGAAGAG | TGAGAAGAGGCTGAGACATAGG |
| Tlr4 | AGTAGCACTGACACCTTCCTT | GCCTTAGCCTCTTCTCCTTCA |
| Cpt1b | CCACAGACAGAGGCACTT | CAGGAGACGGACACAGATAG |
| Ym1 | CACCATGGCCAAGCTCATTCTTGT | TATTGGCCTGTCCTTAGCCCAACT |
| Ucp1 | GAGGTGTGGCAGTGTTCATT | CTGTGGTGGCTATAACTCTGTAAG |
| Cidea | TCCTCGGCTGTCTCAATGT | GATGGCTGCTCTTCTGTATCG |
| Cox7a1 | GTGGCAGAGAAGCAGAAG | CCAAGCAGTATAAGCAGTAGG |
| Elovl3 | ACGGAACACTTCTTCTGGTCTT | CCTACTCTCATTGGCTCTTGGA |
| Bmp8b | GCTCAGGCTCTTCAGTATC | ACAGGCTATGGAGTGCTA |
| Serca2b | ACCTTTGCCGCTCATTTTCCAG | AGGCTGCACACACTCTTTACC |
| Pm20d1 | AAAGAGGCGCTGAAAGGTG | GTGGCTGAAAGACACTGTGG |
| Trpv2 | TTGACCGTGACCGACTCTT | GGCAGGATACAGGCATTGAC |
